# Supplementary material for: A socio-ecological approach to physical activity interventions in childcare: a systematic review
Source: Springer Nature journal article supplement (doi:10.1186/1479-5868-11-22), 2014-01-01
Supplement: 12966_2013_852_MOESM2_ESM.pdf [file 12966_2013_852_MOESM2_ESM.pdf]

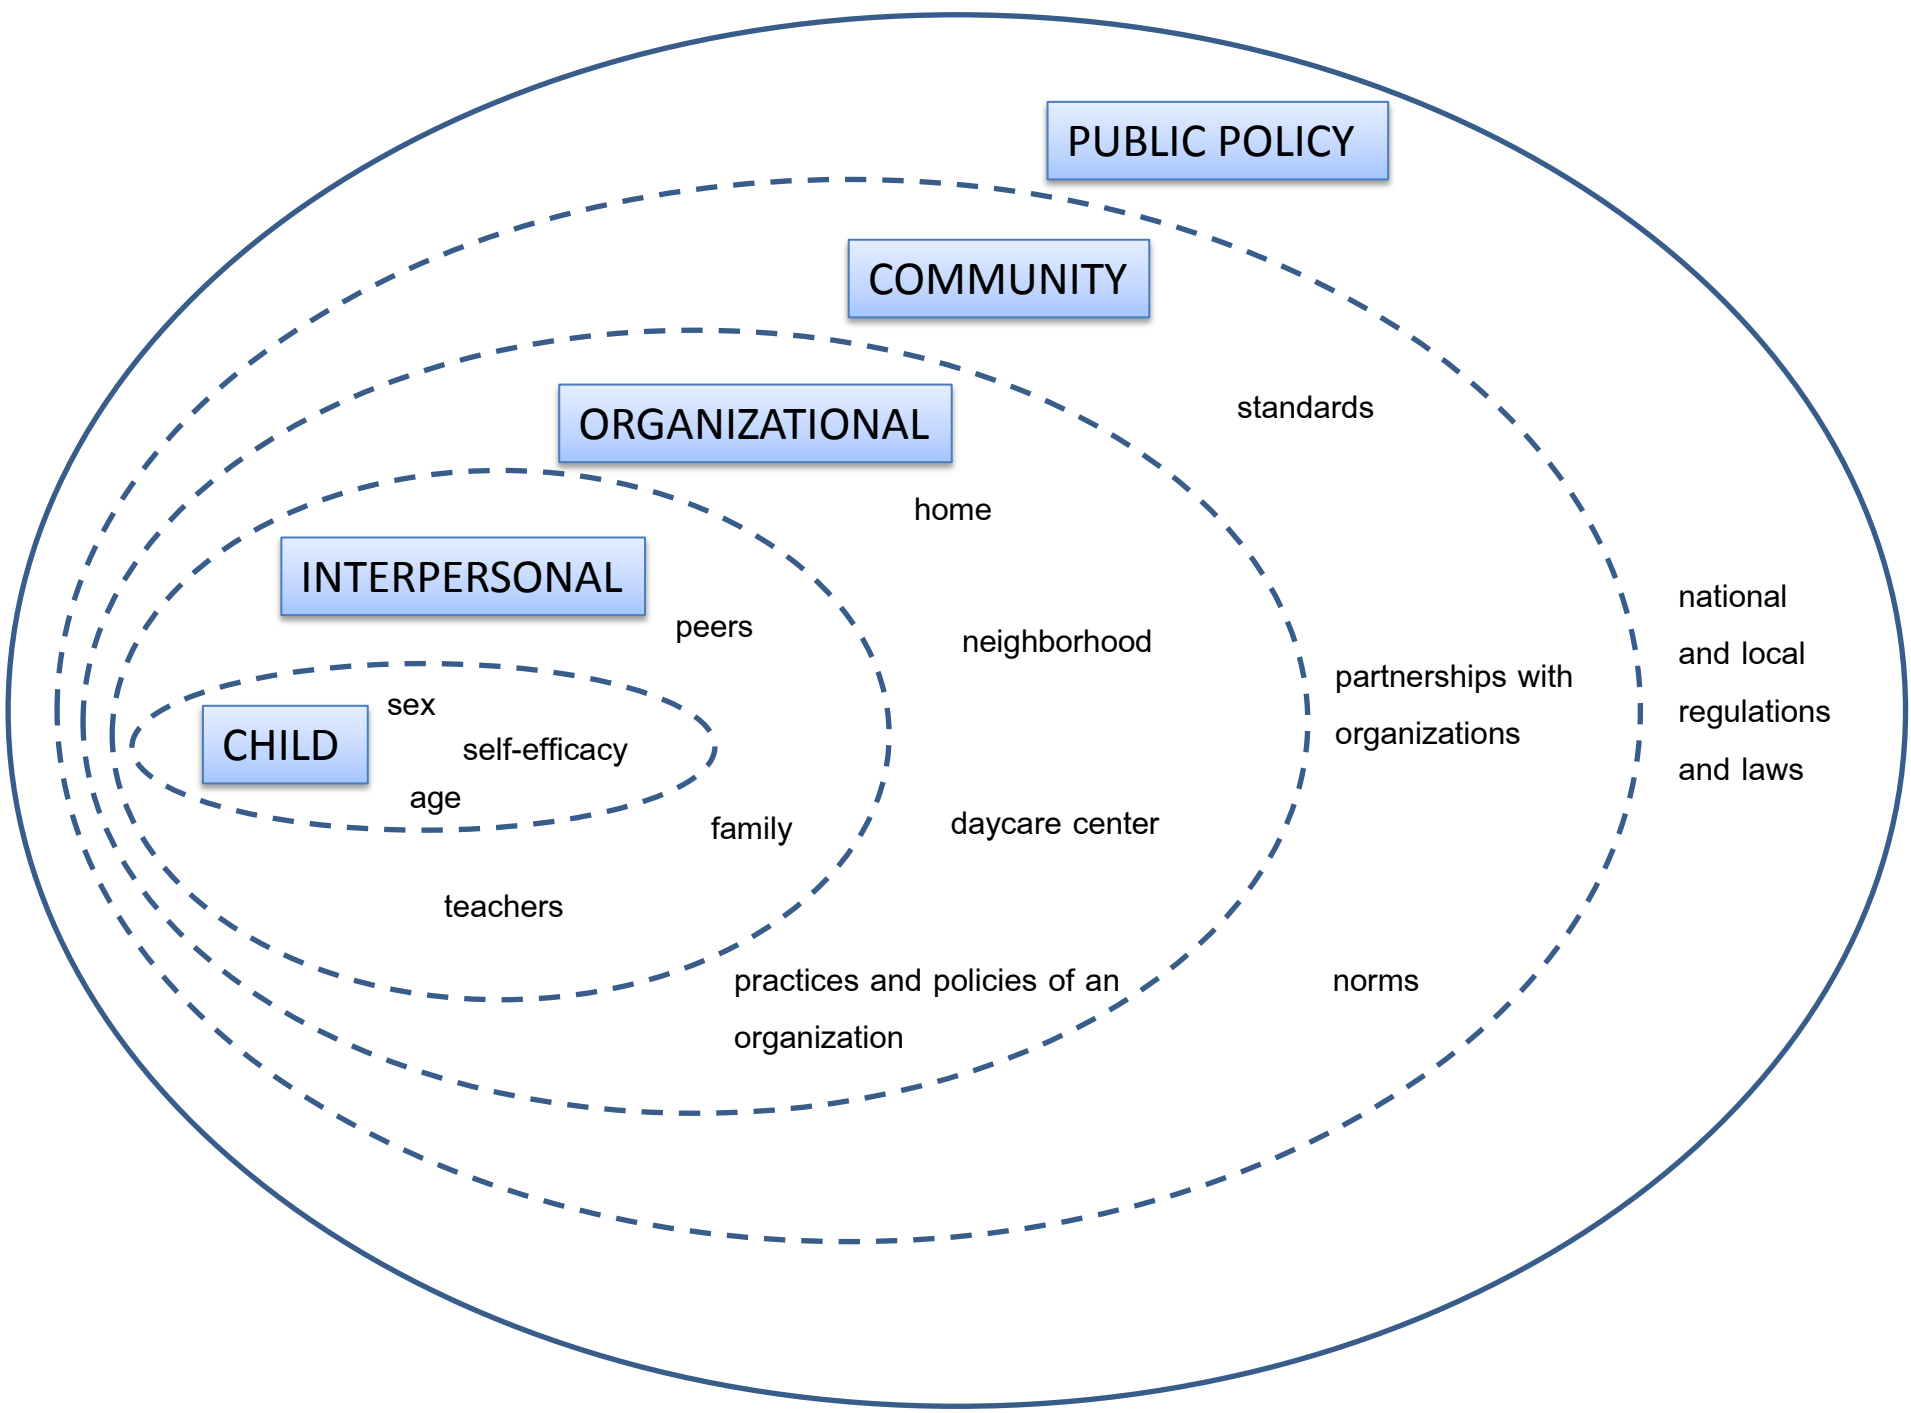

PUBLIC POLICY

COMMUNITY

ORGANIZATIONAL

INTERPERSONAL

CHILD

standards

home

neighborhood

partnerships with organizations

national and local regulations and laws

peers

daycare center

sex

self-efficacy

age

family

teachers

practices and policies of an organization

norms
