# Supplementary material for: A socio-ecological approach to physical activity interventions in childcare: a systematic review
Source: Springer Nature journal article supplement (doi:10.1186/1479-5868-11-22), 2014-01-01

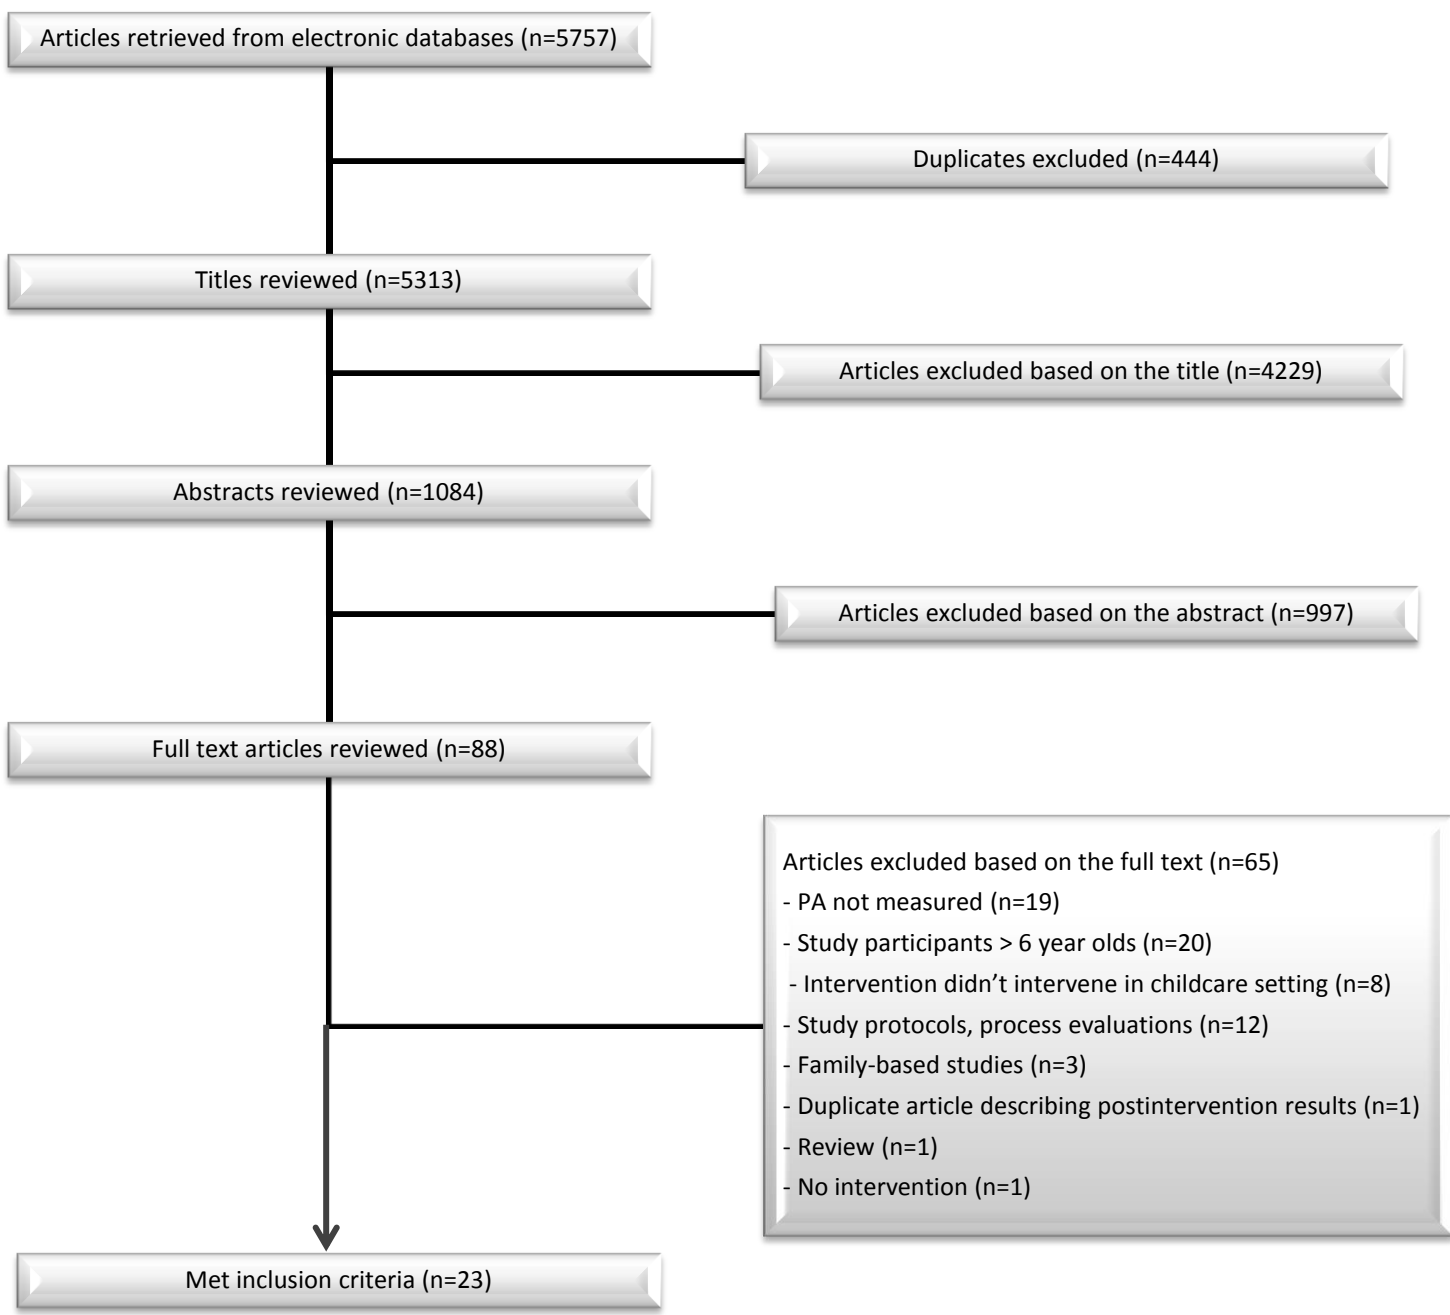

Supplement: 12966_2013_852_MOESM3_ESM.pdf [file 12966_2013_852_MOESM3_ESM.pdf]
